# Supplementary material for: Effects of treatment with SGLT-2 inhibitors on arginine-related cardiovascular and renal biomarkers
Source: PubMed Central journal article supplement (PMC8740418; doi:10.1186/s12933-021-01436-x), 2022-01-06
Supplement: 12933_2021_1436_MOESM1_ESM.pdf [file 12933_2021_1436_MOESM1_ESM.pdf]

## **SUPPLEMENTAL INFORMATION**

### **Effects of Treatment with SGLT-2 Inhibitors on Arginine-related Cardiovascular and Renal Biomarkers**

Arne Gessner<sup>1</sup>, Anna Gemeinhardt<sup>1</sup>, Agnes Bosch<sup>2</sup>, Dennis Kannenkeril<sup>2</sup>, Christian Staerk<sup>3</sup>,  
Andreas Mayr<sup>3</sup>, Martin F. Fromm<sup>1</sup>, Roland E. Schmieder<sup>2</sup>, and Renke Maas<sup>1</sup>

<sup>1</sup>Institute of Experimental and Clinical Pharmacology and Toxicology, Friedrich-Alexander-Universität Erlangen-Nürnberg, Erlangen, Germany

<sup>2</sup>Department of Nephrology and Hypertension, University Hospital Erlangen, Germany

<sup>3</sup>Institute of Medical Biometry, Informatics and Epidemiology, University Hospital Bonn, Bonn, Germany

Address for correspondence: Dr. Arne Gessner, Institute of Experimental and Clinical Pharmacology and Toxicology, Friedrich-Alexander-Universität Erlangen-Nürnberg, Fahrstr. 17, 91054 Erlangen, Germany. Tel: +49 9131 85 22869; Fax: +49 9131 85 22773; E-mail: arne.gessner@fau.de

**Table S1: Results for quality control (QC) samples**

A total of 386 plasma and 385 urine samples were quantified in 12 batches (6 plasma, 6 urine). Each batch contained QC samples at the nominal concentration indicated in duplicates. An aliquot of a real sample (LTS) was analyzed in each batch to ensure consistency.

| <b>Homoarginine</b> |        |       |       |                              |       |       |
|---------------------|--------|-------|-------|------------------------------|-------|-------|
|                     | Plasma |       |       | Urine                        |       |       |
|                     | NC     | Acc.  | Prec. | NC                           | Acc.  | Prec. |
| Q1                  | 20     | 104.4 | 7.0   | 10                           | 95.7  | 10.2  |
| Q5                  | 4      | 98.9  | 7.6   | 1.48                         | 95.8  | 8.3   |
| Q9                  | 0.8    | 100.1 | 6.8   | 0.0412                       | 107.6 | 9.5   |
| Q10                 | 0.4    | 101.8 | 8.0   | n.a. (below validated range) |       |       |
| LTS female          | n.a.   |       | 8.8   | n.a.                         |       | 13.4  |
| LTS male            | n.a.   |       | 8.6   | n.a.                         |       | 10.9  |
| <b>Arginine</b>     |        |       |       |                              |       |       |
|                     | Plasma |       |       | Urine                        |       |       |
|                     | NC     | Acc.  | Prec. | NC                           | Acc.  | Prec. |
| Q1                  | 300    | 103.2 | 5.1   | 100                          | 105.7 | 12.2  |
| Q5                  | 60     | 99.8  | 9.9   | 28.4                         | 104.4 | 9.5   |
| Q9                  | 12     | 94.9  | 7.5   | 2.5                          | 96.1  | 14.1  |
| Q10                 | 6      | 97.8  | 11.4  | 1.67                         | 99.6  | 14.0  |
| LTS female          | n.a.   |       | 10.2  | n.a.                         |       | 11.6  |
| LTS male            | n.a.   |       | 12.2  | n.a.                         |       | 7.8   |
| <b>ADMA</b>         |        |       |       |                              |       |       |
|                     | Plasma |       |       | Urine                        |       |       |
|                     | NC     | Acc.  | Prec. | NC                           | Acc.  | Prec. |
| Q1                  | 5      | 106.3 | 4.2   | 100                          | 101.7 | 9.2   |
| Q5                  | 1      | 99.9  | 4.0   | 28.4                         | 98.2  | 10.8  |
| Q9                  | 0.2    | 101.3 | 7.0   | 2.5                          | 101.5 | 7.7   |
| Q10                 | 0.1    | 104.6 | 6.6   | 1.67                         | 100.4 | 12.5  |
| LTS female          | n.a.   |       | 4.0   | n.a.                         |       | 9.3   |
| LTS male            | n.a.   |       | 3.6   | n.a.                         |       | 7.3   |
| <b>SDMA</b>         |        |       |       |                              |       |       |
|                     | Plasma |       |       | Urine                        |       |       |
|                     | NC     | Acc.  | Prec. | NC                           | Acc.  | Prec. |
| Q1                  | 5      | 105.3 | 4.5   | 100                          | 100.9 | 5.3   |
| Q5                  | 1      | 100.7 | 3.2   | 28.4                         | 102.2 | 6.7   |
| Q9                  | 0.2    | 96.5  | 5.5   | 2.5                          | 100.7 | 7.7   |
| Q10                 | 0.1    | 97.5  | 5.2   | 1.67                         | 96.3  | 6.9   |
| LTS female          | n.a.   |       | 5.2   | n.a.                         |       | 6.7   |
| LTS male            | n.a.   |       | 2.7   | n.a.                         |       | 3.8   |
| <b>Creatinine</b>   |        |       |       |                              |       |       |
|                     | Plasma |       |       | Urine                        |       |       |
|                     | NC     | Acc.  | Prec. | NC                           | Acc.  | Prec. |
| Q1                  | 350    | 105.1 | 4.7   | 50000                        | 105.9 | 7.0   |
| Q5                  | 70     | 94.1  | 4.7   | 14200                        | 104.3 | 5.4   |
| Q9                  | 14     | 105.4 | 10.2  | 1250                         | 96.5  | 11.8  |
| Q10                 | n.a.   |       |       | 417                          | 96.6  | 6.9   |
| LTS female          | n.a.   |       | 3.4   | n.a.                         |       | 7.1   |
| LTS male            | n.a.   |       | 3.1   | n.a.                         |       | 6.8   |

NC: nominal concentration in  $\mu\text{mol/L}$ , Acc.: accuracy in % of NC, Prec.: precision as coefficient of variation of acc. in %, LTS: long term stability.

**Table S2: Clinical characteristics after 6 weeks of treatment with empagliflozin or dapagliflozin**

|              | Empagliflozin |              |         | Dapagliflozin |              |         |
|--------------|---------------|--------------|---------|---------------|--------------|---------|
|              | At baseline   | After verum  | p-value | At baseline   | After verum  | p-value |
| <b>HbA1c</b> | 6.75 ± 0.78   | 6.70 ± 0.75  | 0.335   | 6.67 ± 0.73   | 6.62 ± 0.67  | 0.224   |
| <b>FPG</b>   | 139.6 ± 31.1  | 116.8 ± 19.6 | < 0.001 | 132.3 ± 28.1  | 114.0 ± 19.1 | < 0.001 |
| <b>BMI</b>   | 30.1 ± 4.2    | 29.8 ± 4.2   | < 0.001 | 29.9 ± 4.3    | 29.5 ± 4.1   | < 0.001 |
| <b>SBP</b>   | 128.8 ± 13.9  | 123.1 ± 12.5 | < 0.001 | 133.3 ± 12.5  | 129.4 ± 11.8 | 0.009   |

HbA1c: glycated hemoglobin in %, FPG: fasting plasma glucose in mg/dL, BMI: body mass index in kg/m<sup>2</sup>, SBP: systolic blood pressure in mmHg; all in mean ± standard deviation.

**Table S3: Key mechanisms governing transport and metabolism of homoarginine, arginine, ADMA, and SDMA (adopted from [1])**

|                               | Homoarginine                                             | Arginine                                                 | ADMA                                                                     | SDMA                                                                 |
|-------------------------------|----------------------------------------------------------|----------------------------------------------------------|--------------------------------------------------------------------------|----------------------------------------------------------------------|
| <b>CAT1</b>                   | Transported                                              | Transported                                              | Transported                                                              | Transported                                                          |
| <b>DDAH1</b>                  | No substrate                                             | No substrate                                             | Main metabolizing enzyme                                                 | No substrate                                                         |
| <b>AGXT2</b>                  | Substrate                                                |                                                          | Substrate                                                                | Main metabolizing enzyme                                             |
| <b>Arginases</b>              | No substrate                                             | Substrate                                                | No substrate                                                             | No substrate                                                         |
| <b>Nitric oxide synthases</b> | Weak substrate                                           | Major Substrate                                          | Inhibitor                                                                | No substrate                                                         |
| <b>Urine</b>                  | Glomerular filtration but extensive tubular reabsorbtion | Glomerular filtration but extensive tubular reabsorbtion | Glomerular filtration, enriched in urine, secondary route of elimination | Glomerular filtration, enriched in urine, major route of elimination |

**Table S4: Effect estimates of the difference in plasma concentrations between verum and placebo treatment.** Linear mixed effects models for the two post-baseline concentrations (verum / placebo), adjusted for baseline, the ordering in the cross-over design and the additional covariates age and sex. The models contain subject-specific random intercepts to account for repeated measurements.

|                      |              | Difference after verum treatment vs. placebo treatment | 95% confidence interval of difference |             | p-value        |
|----------------------|--------------|--------------------------------------------------------|---------------------------------------|-------------|----------------|
|                      |              |                                                        | lower limit                           | upper limit |                |
| <i>Empagliflozin</i> | Homoarginine | -0.255                                                 | -0.375                                | -0.134      | < <b>0.001</b> |
|                      | Arginine     | -3.41                                                  | -7.64                                 | 0.81        | 0.118          |
|                      | ADMA         | 0.007                                                  | -0.009                                | 0.023       | 0.365          |
|                      | SDMA         | 0.040                                                  | 0.028                                 | 0.053       | < <b>0.001</b> |
|                      | Creatinine   | 1.56                                                   | 0.06                                  | 3.07        | <b>0.046</b>   |
| <i>Dapagliflozin</i> | Homoarginine | -0.211                                                 | -0.322                                | -0.099      | <b>0.001</b>   |
|                      | Arginine     | 0.10                                                   | -3.74                                 | 4.00        | 0.959          |
|                      | ADMA         | 0.008                                                  | -0.009                                | 0.024       | 0.365          |
|                      | SDMA         | 0.026                                                  | 0.013                                 | 0.040       | < <b>0.001</b> |
|                      | Creatinine   | 2.42                                                   | 0.026                                 | 4.84        | 0.054          |

**Table S5: Effect estimates of the difference in urine concentration between verum and placebo treatment.** Linear mixed effects models for the two post-baseline concentrations (verum / placebo), adjusted for baseline, the ordering in the cross-over design and the additional covariates age and sex. The models contain subject-specific random intercepts to account for repeated measurements. Outcome values were log-transformed.

|                      |                  | Difference after verum treatment vs. placebo treatment | 95% confidence interval of difference |             | p-value      |
|----------------------|------------------|--------------------------------------------------------|---------------------------------------|-------------|--------------|
|                      |                  |                                                        | lower limit                           | upper limit |              |
| <i>Empagliflozin</i> | log Homoarginine | -0.06                                                  | -0.24                                 | 0.11        | 0.479        |
|                      | log Arginine     | 0.03                                                   | -0.13                                 | 0.19        | 0.703        |
|                      | log ADMA         | -0.21                                                  | -0.33                                 | -0.08       | <b>0.002</b> |
|                      | log SDMA         | -0.01                                                  | -0.07                                 | 0.06        | 0.841        |
|                      | log Creatinine   | -0.11                                                  | -0.18                                 | -0.03       | <b>0.007</b> |
| <i>Dapagliflozin</i> | log Homoarginine | 0.07                                                   | -0.10                                 | 0.26        | 0.423        |
|                      | log Arginine     | 0.01                                                   | -0.18                                 | 0.20        | 0.897        |
|                      | log ADMA         | -0.07                                                  | -0.16                                 | 0.01        | 0.093        |
|                      | log SDMA         | -0.06                                                  | -0.15                                 | 0.03        | 0.179        |
|                      | log Creatinine   | -0.08                                                  | -0.16                                 | 0.004       | 0.066        |

**Table S6: Effect estimates of the difference in renal clearance between verum and placebo treatment.** Linear mixed effects models for the two post-baseline concentrations (verum / placebo), adjusted for baseline, the ordering in the cross-over design and the additional covariates age and sex. The models contain subject-specific random intercepts to account for repeated measurements. Outcome values were log-transformed.

|                      |                  | Difference after verum treatment vs. placebo treatment | 95% confidence interval of difference |             | p-value      |
|----------------------|------------------|--------------------------------------------------------|---------------------------------------|-------------|--------------|
|                      |                  |                                                        | lower limit                           | upper limit |              |
| <i>Empagliflozin</i> | log Homoarginine | 0.104                                                  | -0.082                                | 0.290       | 0.276        |
|                      | log Arginine     | 0.108                                                  | -0.065                                | 0.282       | 0.228        |
|                      | log ADMA         | -0.232                                                 | -0.383                                | -0.082      | <b>0.004</b> |
|                      | log SDMA         | -0.113                                                 | -0.190                                | -0.036      | <b>0.006</b> |
|                      | log Creatinine   | -0.125                                                 | -0.198                                | -0.052      | <b>0.001</b> |
| <i>Dapagliflozin</i> | log Homoarginine | 0.194                                                  | 0.016                                 | 0.375       | <b>0.038</b> |
|                      | log Arginine     | 0.016                                                  | -0.179                                | 0.209       | 0.869        |
|                      | log ADMA         | -0.097                                                 | -0.201                                | 0.007       | 0.073        |
|                      | log SDMA         | -0.140                                                 | -0.240                                | -0.041      | <b>0.008</b> |
|                      | log Creatinine   | -0.122                                                 | -0.217                                | -0.029      | <b>0.014</b> |

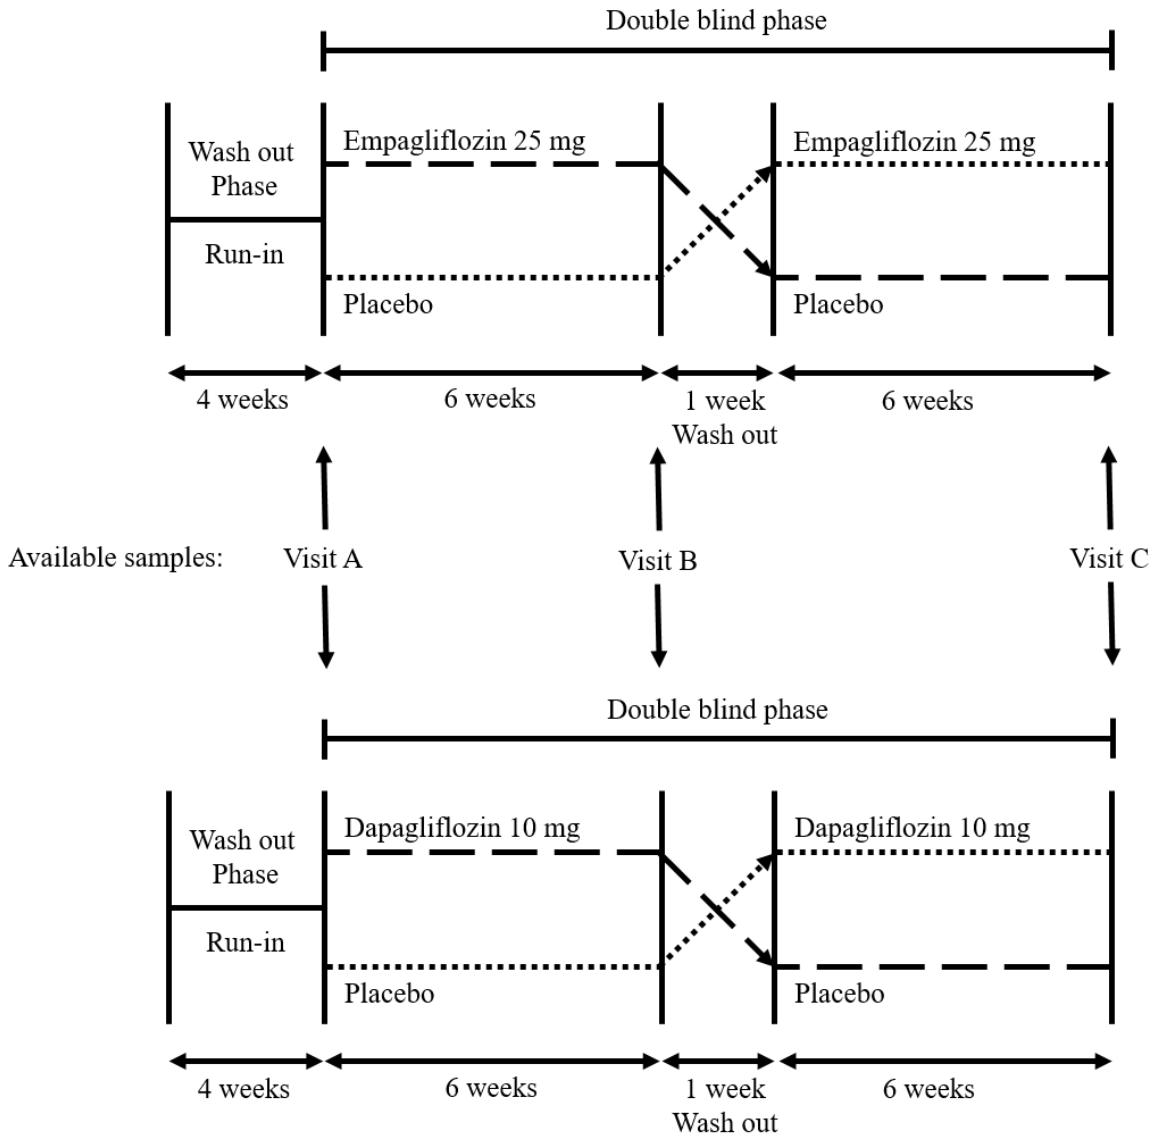

**Figure S1: Study design.** Plasma and urine samples were taken at the indicated time points (adopted from [2]).

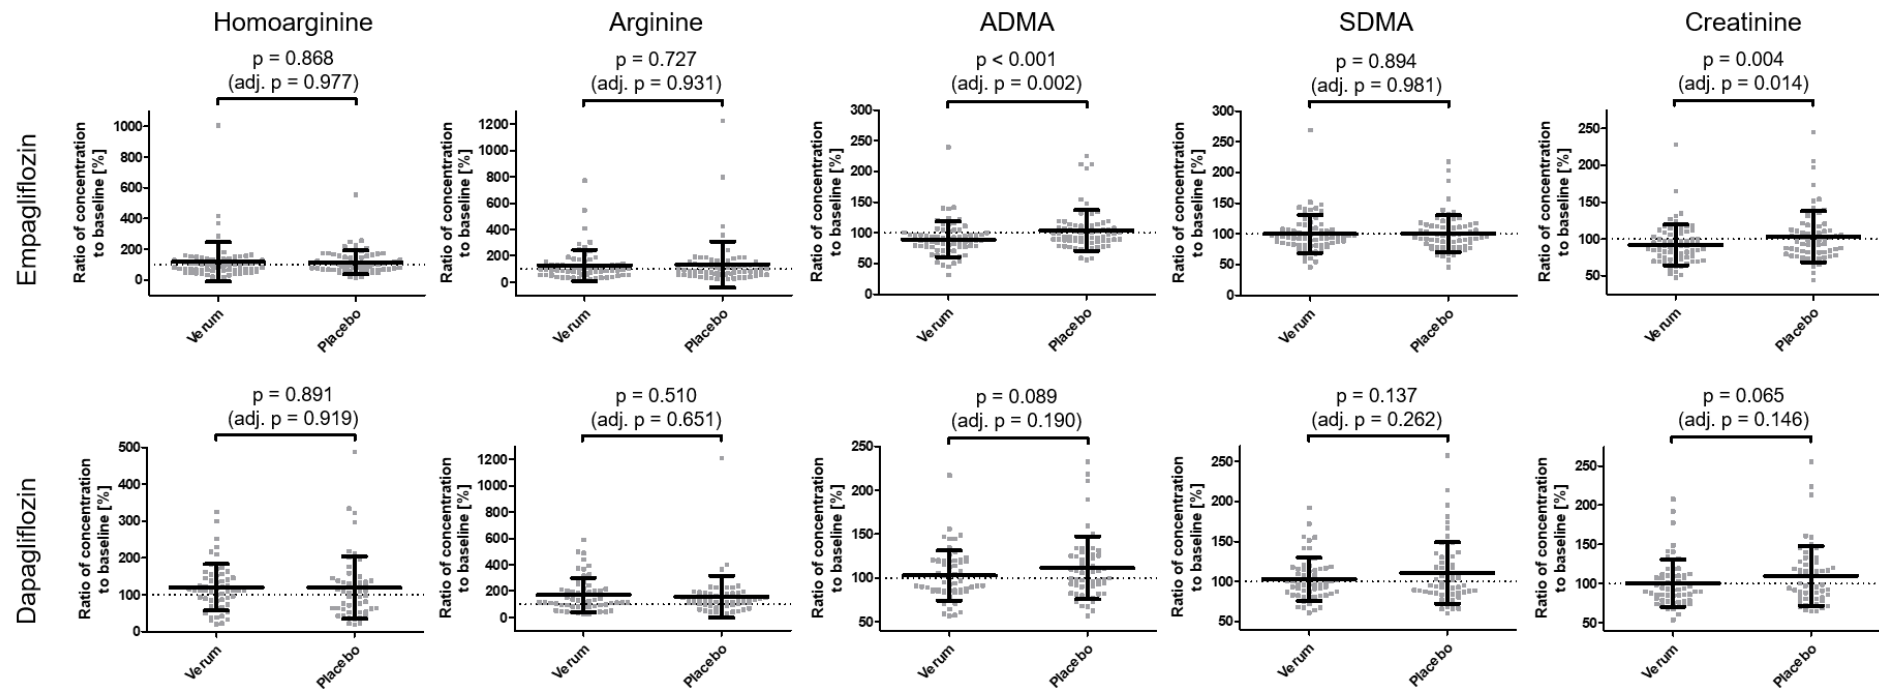

**Figure S2:** Intraindividual percental change of amount excreted in urine after treatment with empagliflozin or dapagliflozin, p-values calculated by Wilcoxon signed-rank test; p-values refer to the percentage changes of biomarkers; adj. p-values computed based on the procedure of Benjamini and Hochberg.

## **SUPPLEMENTARY REFERENCES**

1. Banjarnahor S, Rodionov RN, König J, Maas R: Transport of L-arginine related cardiovascular risk markers. *J Clin Med.* 2020; 9(12):3975-4016.
2. Ott C, Jumar A, Striepe K, Friedrich S, Karg MV, Bramlage P, Schmieder RE: A randomised study of the impact of the SGLT2 inhibitor dapagliflozin on microvascular and macrovascular circulation. *Cardiovasc Diabetol.* 2017; 16(1):26-35.
